# Supplementary material
Source: PubMed Central journal article supplement (PMC7058764)
Supplement: 42770_2019_155_MOESM1_ESM.pdf [file 42770_2019_155_MOESM1_ESM.pdf]

**Table S1** - Characteristics of the 40 *Salmonella* Typhimurium strains sequenced and studied, isolated from different sources in the São Paulo State in Brazil between 1983 and 2013

| GenBank Accession Number | Strains sequenced | Sources                                | Year of isolation | Sequence Type (ST) |
|--------------------------|-------------------|----------------------------------------|-------------------|--------------------|
| LVHB00000000             | CFSAN033849       | Human Faeces                           | 1983              | 19                 |
| LVHA00000000             | CFSAN033850       | Human Faeces                           | 1983              | 19                 |
| LVGZ00000000             | CFSAN033851       | Human Faeces                           | 1983              | 19                 |
| LVGX00000000             | CFSAN033853       | Human Faeces                           | 1983              | 1649               |
| LVGW00000000             | CFSAN033854       | Human Faeces                           | 1983              | 19                 |
| MABI00000000             | CFSAN033855       | Human Faeces                           | 1983              | 19                 |
| LVGU00000000             | CFSAN033857       | Human Faeces                           | 1984              | 19                 |
| LVGT00000000             | CFSAN033858       | Human Faeces                           | 1984              | 19                 |
| LVGS00000000             | CFSAN033860       | Human Faeces                           | 1984              | 19                 |
| LVGR00000000             | CFSAN033861       | Human Faeces                           | 1984              | 19                 |
| LVGP00000000             | CFSAN033863       | Human Faeces                           | 1984              | 19                 |
| LVGO00000000             | CFSAN033864       | Human Faeces                           | 1985              | 19                 |
| LVGN00000000             | CFSAN033865       | Human Faeces                           | 1985              | 19                 |
| LVGM00000000             | CFSAN033866       | Human Faeces                           | 1986              | 19                 |
| LVGL00000000             | CFSAN033867       | Human Faeces                           | 1986              | 19                 |
| LUJF00000000             | CFSAN033868       | Human Faeces                           | 1986              | 19                 |
| LVGK00000000             | CFSAN033869       | Human Faeces                           | 1986              | 19                 |
| LVGJ00000000             | CFSAN033870       | Human Faeces                           | 1986              | 19                 |
| LVGI00000000             | CFSAN033871       | Human Faeces                           | 1986              | 19                 |
| LVGH00000000             | CFSAN033872       | Human Faeces                           | 1986              | 19                 |
| LVGF00000000             | CFSAN033874       | Human Faeces                           | 1986              | 19                 |
| LVGE00000000             | CFSAN033876       | Human Faeces                           | 1989              | 313                |
| LVGD00000000             | CFSAN033877       | Human Faeces                           | 1990              | 313                |
| LUJD00000000             | CFSAN033878       | Human Faeces                           | 1991              | 19                 |
| LVGC00000000             | CFSAN033879       | Human Faeces                           | 1992              | 19                 |
| LVGB00000000             | CFSAN033880       | Human Faeces                           | 1992              | 19                 |
| LVGA00000000             | CFSAN033881       | Human Faeces                           | 1993              | 313                |
| LVFZ00000000             | CFSAN033882       | Human Faeces                           | 1995              | 313                |
| LVFX00000000             | CFSAN033884       | Raw pork sausage                       | 1996              | 313                |
| LUJC00000000             | CFSAN033885       | Human Faeces                           | 1997              | 19                 |
| LUJB00000000             | CFSAN033886       | Human Faeces                           | 1998              | 313                |
| LUJA00000000             | CFSAN033887       | Lettuce                                | 1998              | 313                |
| LUIZ00000000             | CFSAN033889       | Human Faeces                           | 1999              | 19                 |
| LVFV00000000             | CFSAN033890       | Human Faeces                           | 2000              | 19                 |
| LVFU00000000             | CFSAN033891       | Blood                                  | 2000              | 313                |
| LUIX00000000             | CFSAN033894       | Human Faeces                           | 2003              | 313                |
| LUIW00000000             | CFSAN033895       | Brain abscess                          | 2005              | 19                 |
| LVFS00000000             | CFSAN033896       | Human Faeces                           | 2010              | 19                 |
| LUHV00000000             | CFSAN033933       | Final product sales<br>(animal origin) | 2013              | 19                 |
| LUHT00000000             | CFSAN033935       | Final product sales<br>(animal origin) | 2013              | 19                 |
