# Supplementary material
Source: PubMed Central journal article supplement (PMC7058764)
Supplement: 42770_2019_155_MOESM2_ESM.pdf [file 42770_2019_155_MOESM2_ESM.pdf]

**Table S2** - Characteristics of the 30 *Salmonella* Typhimurium genomes retrieved from GenBank

| <b>GenBank Accession Number</b> | <b>Sources</b>     | <b>Sequence Type (ST)</b> | <b>Geographical areas</b> | <b>Circles colors*</b> |
|---------------------------------|--------------------|---------------------------|---------------------------|------------------------|
| GCF_000006945.2_<br>ASM694v2    | Human              | 19                        | UK                        | Dark green             |
| GCF_000022165.1_<br>ASM2216v1   | Chicken            | 19                        | USA                       | Dark green             |
| GCF_000027025.1_<br>ASM2702v1   | Human              | 313                       | Malawi/Africa             | Red                    |
| GCF_000188735.1_<br>ASM18873v1  | Calf               | 19                        | UK                        | Dark green             |
| GCF_000210855.2_<br>ASM21085v2  | Cattle             | 19                        | UK                        | Dark green             |
| GCF_000213635.1_<br>ASM21363v1  | Horse              | 19                        | UK                        | Dark green             |
| GCF_000283735.1_<br>ASM28373v1  | Human              | 19                        | UK                        | Dark green             |
| GCF_000380325.1_<br>ASM38032v1  | Human              | 19                        | UK                        | Dark green             |
| GCF_000493535.2_<br>DT2         | Pigeon             | 128                       | Germany                   | Black                  |
| GCF_000493675.1_<br>DT104       | Human              | 19                        | UK                        | Dark green             |
| GCF_000743055.1_<br>ASM74305v1  | Sheep              | 2066                      | Japan                     | Grey                   |
| GCF_000941015.2_<br>ASM94101v2  | Cattle             | 19                        | USA                       | Dark green             |
| GCF_000973645.1_<br>ASM97364v1  | Human              | 19                        | USA                       | Dark green             |
| GCF_000993725.1_<br>ASM99372v1  | Blood              | 413                       | South Korea               | Brown                  |
| GCF_001293505.1_<br>ASM129350v1 | Sistemic infection | 213                       | Mexico                    | Yellow                 |
| GCF_001454965.1_<br>ASM145496v1 | Food               | 166                       | South Korea               | Pink                   |
| GCF_001540845.1_<br>SO4698_09   | Cattle             | 34                        | UK                        | Purple                 |
| GCF_001576255.1_<br>ASM157625v1 | Human              | 19                        | Mexico                    | Dark green             |
| GCF_001576275.1_<br>ASM157627v1 | Human              | 302                       | Mexico                    | Dark blue              |
| GCF_001577505.1_<br>ASM157750v1 | Human              | 302                       | Mexico                    | Dark blue              |
| GCF_001623645.1_<br>ASM162364v1 | Human              | 19                        | USA                       | Dark green             |
| GCF_001623685.1_<br>ASM162368v1 | Human              | 19                        | USA                       | Dark green             |
| GCF_001623705.1_<br>ASM162370v1 | Cattle             | 19                        | USA                       | Dark green             |
| GCF_001623725.1_                | Cattle             | 19                        | USA                       | Dark green             |

|                  |            |           |  |        |             |
|------------------|------------|-----------|--|--------|-------------|
| ASM162372v1      |            |           |  |        |             |
| GCF_001623745.2_ | Cattle     | 19        |  | USA    | Dark green  |
| ASM162374v2      |            |           |  |        |             |
| GCF_001623765.2_ | Food       | 19        |  | USA    | Dark green  |
| ASM162376v2      |            |           |  |        |             |
| GCF_001623845.1_ | Cattle     | 19        |  | USA    | Dark green  |
| ASM162384v1      |            |           |  |        |             |
| GCF_001886995.1_ | Wild birds | Unknow ST |  | Canada | White       |
| ASM188699v1      |            |           |  |        |             |
| GCF_001887015.1_ | Wild birds | 99        |  | Canada | Light green |
| ASM188701v1      |            |           |  |        |             |
| GCF_002009155.1_ | Birds      | 19        |  | USA    | Dark green  |
| ASM200915v1      |            |           |  |        |             |

---

\* Presented in the Figures 1, 3 and 4.
