# Supplementary material
Source: PubMed Central journal article supplement (PMC7058764)
Supplement: 42770_2019_155_MOESM3_ESM.pdf [file 42770_2019_155_MOESM3_ESM.pdf]

**Table S3 - Average Nucleotide Identity (ANI)**

| #ANI and aligned percentage | CFSAN0338 76_01.fna | CFSAN0338 77_01.fna | CFSAN0338 81_01.fna | CFSAN0338 82_01.fna | CFSAN0338 84_01.fna | CFSAN0338 86_01.fna | CFSAN0338 87_01.fna | CFSAN0338 91_01.fna | CFSAN0338 94_01.fna | GCF_0000 27025.fna |
|-----------------------------|---------------------|---------------------|---------------------|---------------------|---------------------|---------------------|---------------------|---------------------|---------------------|--------------------|
| CFSAN0338 76_01.fna         | *                   | 99.91               | 99.97               | 99.98               | 99.95               | 99.95               | 99.95               | 99.97               | 99.97               | 99.80              |
| CFSAN0338 77_01.fna         | 99.91               | *                   | 99.99               | 99.99               | 99.98               | 99.99               | 99.97               | 99.99               | 99.98               | 99.85              |
| CFSAN0338 81_01.fna         | 99.81               | 99.83               | *                   | 99.89               | 99.86               | 99.88               | 99.86               | 99.89               | 99.92               | 99.74              |
| CFSAN0338 82_01.fna         | 99.92               | 99.93               | 99.99               | *                   | 99.96               | 99.99               | 99.96               | 99.99               | 99.98               | 99.84              |
| CFSAN0338 84_01.fna         | 99.92               | 99.98               | 99.99               | 99.99               | *                   | 99.99               | 99.98               | 99.99               | 99.98               | 99.82              |
| CFSAN0338 86_01.fna         | 99.92               | 99.93               | 99.99               | 99.99               | 99.96               | *                   | 99.96               | 99.99               | 99.97               | 99.79              |
| CFSAN0338 87_01.fna         | 99.91               | 99.92               | 99.99               | 99.99               | 99.95               | 99.98               | *                   | 99.99               | 99.98               | 99.85              |
| CFSAN0338 91_01.fna         | 99.91               | 99.94               | 99.99               | 99.99               | 99.99               | 99.98               | 99.97               | *                   | 99.98               | 99.84              |
| CFSAN0338 94_01.fna         | 99.84               | 99.87               | 99.96               | 99.93               | 99.90               | 99.92               | 99.90               | 99.92               | *                   | 99.85              |
| GCF_00002 7025.fna          | 99.79               | 99.79               | 99.87               | 99.84               | 99.81               | 99.84               | 99.82               | 99.84               | 99.92               | *                  |
